# Supplementary material for: Associations between Repeated Measures of Maternal Urinary Phthalate Metabolites and Thyroid Hormone Parameters during Pregnancy
Source: PubMed Central journal article supplement (PMC5089879; doi:10.1289/ehp170), 2016-05-06
Supplement: EHP170.s001.acco.pdf [file EHP170.s001.acco.pdf]

**Note to readers with disabilities:** *EHP* strives to ensure that all journal content is accessible to all readers. However, some figures and Supplemental Material published in *EHP* articles may not conform to [508 standards](#) due to the complexity of the information being presented. If you need assistance accessing journal content, please contact [ehp508@niehs.nih.gov](mailto:ehp508@niehs.nih.gov). Our staff will work with you to assess and meet your accessibility needs within 3 working days.

## **Supplemental Material**

### **Associations between Repeated Measures of Maternal Urinary Phthalate Metabolites and Thyroid Hormone Parameters during Pregnancy**

Lauren E. Johns<sup>1</sup>, Kelly K. Ferguson<sup>1</sup>, Thomas F. McElrath<sup>2</sup>, Bhramar Mukherjee, and John D. Meeker<sup>1</sup>

#### **Table of Contents**

**Table S1:** Cross-sectional analysis: percent change (95% CIs) in thyroid hormone concentrations in relation to interquartile range increase in urinary phthalate metabolite concentrations by study visit during gestation

**Table S1.** Cross-sectional analysis: percent change (95% CIs) in thyroid hormone concentrations in relation to interquartile range increase in urinary phthalate metabolite concentrations by study visit during gestation

| <b>Visit 1 : median 10 weeks of gestation</b> |                      |         |                     |         |                     |         |                     |         |                     |         |
|-----------------------------------------------|----------------------|---------|---------------------|---------|---------------------|---------|---------------------|---------|---------------------|---------|
| Analyte                                       | %Δ (95%CI)           | p-value | %Δ (95%CI)          | p-value | %Δ (95%CI)          | p-value | %Δ (95%CI)          | p-value | %Δ (95%CI)          | p-value |
|                                               | <b>ln-TSH</b>        |         | <b>Free T4</b>      |         | <b>Total T3</b>     |         | <b>Total T4</b>     |         | <b>T3/T4 Ratio</b>  |         |
| MEHP                                          | -16.0 (-27.6, -2.55) | 0.02*   | 8.24 (-1.06, 17.5)  | 0.08    | -0.11 (-3.98, 3.77) | 0.96    | 0.20 (-2.45, 2.85)  | 0.88    | -0.26 (-2.89, 2.36) | 0.84    |
| MEHHP                                         | -14.9 (-26.1, -1.90) | 0.03*   | 3.22 (-6.00, 12.4)  | 0.49    | 0.76 (-3.22, 4.74)  | 0.71    | 0.04 (-2.72, 2.80)  | 0.98    | 1.00 (-1.70, 3.71)  | 0.46    |
| MEOHP                                         | -15.7 (-27.5, -2.01) | 0.03*   | 5.84 (-2.94, 14.6)  | 0.19    | 1.19 (-2.62, 4.99)  | 0.54    | 0.42 (-2.21, 3.06)  | 0.75    | 0.87 (-1.72, 3.46)  | 0.51    |
| MECPP                                         | -17.8 (-30.6, -2.52) | 0.02*   | 10.5 (0.86, 20.1)   | 0.03*   | 0.57 (-3.55, 4.70)  | 0.78    | 0.67 (-2.12, 3.45)  | 0.64    | 0.13 (-2.66, 2.91)  | 0.93    |
| ΣDEHP                                         | -17.7 (-29.8, -3.46) | 0.02*   | 9.30 (-1.42, 20.0)  | 0.09    | 0.68 (-3.87, 5.23)  | 0.77    | 0.51 (-2.61, 3.62)  | 0.75    | 0.44 (-2.64, 3.52)  | 0.78    |
| MBzP                                          | -13.6 (-29.2, 5.57)  | 0.15    | 2.60 (-8.56, 13.8)  | 0.65    | -0.14 (-4.94, 4.66) | 0.95    | 0.62 (-2.59, 3.82)  | 0.71    | -1.64 (-4.87, 1.59) | 0.32    |
| MBP                                           | -8.99 (-24.0, 8.93)  | 0.30    | -0.99 (-15.4, 13.4) | 0.89    | 1.66 (-4.34, 7.66)  | 0.59    | 0.96 (-3.24, 5.17)  | 0.65    | -0.06 (-4.17, 4.05) | 0.98    |
| MiBP                                          | -11.0 (-27.9, 9.79)  | 0.27    | -1.67 (-13.8, 10.5) | 0.79    | 3.00 (-2.28, 8.27)  | 0.26    | 2.43 (-1.17, 6.04)  | 0.18    | 0.04 (-3.55, 3.64)  | 0.98    |
| MEP                                           | 3.82 (-11.8, 22.1)   | 0.65    | -3.68 (-10.9, 3.54) | 0.32    | 2.36 (-0.76, 5.49)  | 0.14    | 0.51 (-1.59, 2.61)  | 0.63    | 1.18 (-0.94, 3.29)  | 0.27    |
| MCCP                                          | -22.0 (-31.9, -10.6) | 0.00*   | 14.7 (3.41, 26.0)   | 0.01*   | 2.14 (-2.78, 7.05)  | 0.39    | -0.24 (-3.57, 3.08) | 0.89    | 2.14 (-1.16, 5.45)  | 0.20    |
| <b>Visit 2 : median 18 weeks of gestation</b> |                      |         |                     |         |                     |         |                     |         |                     |         |
|                                               | <b>ln-TSH</b>        |         | <b>Free T4</b>      |         | <b>Total T3</b>     |         | <b>Total T4</b>     |         | <b>T3/T4 Ratio</b>  |         |
| MEHP                                          | 3.77 (-6.10, 14.7)   | 0.47    | 4.42 (-2.7, 11.5)   | 0.22    | 1.79 (-1.56, 5.15)  | 0.29    | 1.81 (-0.52, 4.14)  | 0.13    | -0.43 (-3.56, 2.69) | 0.79    |
| MEHHP                                         | 6.44 (-4.38, 18.5)   | 0.26    | 1.36 (-6.23, 8.94)  | 0.73    | 4.45 (0.90, 7.99)   | 0.01*   | 1.31 (-1.16, 3.77)  | 0.30    | 3.25 (-0.05, 6.55)  | 0.05    |
| MEOHP                                         | 8.55 (-2.69, 21.1)   | 0.14    | 1.53 (-6.30, 9.37)  | 0.70    | 4.31 (0.65, 7.97)   | 0.02*   | 2.39 (-0.16, 4.93)  | 0.07    | 1.75 (-1.68, 5.18)  | 0.32    |
| MECPP                                         | 11.3 (-0.03, 24.0)   | 0.05    | 0.89 (-6.50, 8.28)  | 0.81    | 3.41 (-0.05, 6.87)  | 0.05    | 3.27 (0.87, 5.67)   | 0.01*   | 0.01 (-3.24, 3.26)  | 0.99    |
| ΣDEHP                                         | 9.93 (-1.62, 22.8)   | 0.09    | 1.79 (-6.54, 10.1)  | 0.67    | 4.11 (0.20, 8.02)   | 0.04*   | 2.89 (0.18, 5.60)   | 0.04*   | 1.04 (-2.63, 4.70)  | 0.58    |
| MBzP                                          | -12.6 (-23.5, -0.05) | 0.049*  | 1.63 (-6.94, 10.2)  | 0.71    | 3.91 (-0.08, 7.90)  | 0.06    | 5.18 (2.42, 7.94)   | 0.00*   | -0.6 (-4.32, 3.12)  | 0.75    |
| MBP                                           | -12.6 (-23.3, -0.37) | 0.04*   | 9.62 (-1.61, 20.9)  | 0.09    | 3.42 (-1.60, 8.44)  | 0.18    | 2.49 (-1.37, 6.35)  | 0.21    | 1.65 (-3.27, 6.58)  | 0.51    |
| MiBP                                          | -15.1 (-26.9, -1.51) | 0.03*   | 1.77 (-8.43, 12.0)  | 0.73    | 3.05 (-1.57, 7.68)  | 0.19    | 4.18 (0.68, 7.68)   | 0.02*   | 1.29 (-3.26, 5.85)  | 0.58    |
| MEP                                           | -4.99 (-18.0, 5.90)  | 0.28    | 0.95 (-5.32, 7.22)  | 0.77    | 1.44 (-1.46, 4.34)  | 0.33    | 0.89 (-1.17, 2.95)  | 0.40    | 1.54 (-1.16, 4.25)  | 0.26    |
| MCCP                                          | -2.65 (-12.7, 8.56)  | 0.63    | 6.34 (-5.39, 18.1)  | 0.29    | 3.05 (-2.38, 8.48)  | 0.27    | -0.25 (-4.12, 3.63) | 0.91    | 3.44 (-1.66, 8.55)  | 0.19    |
| <b>Visit 3 : median 26 weeks of gestation</b> |                      |         |                     |         |                     |         |                     |         |                     |         |
|                                               | <b>ln-TSH</b>        |         | <b>Free T4</b>      |         | <b>Total T3</b>     |         | <b>Total T4</b>     |         | <b>T3/T4 Ratio</b>  |         |
| MEHP                                          | -6.31 (-13.9, 1.93)  | 0.13    | -2.48 (-16.6, 11.7) | 0.73    | -0.13 (-4.02, 3.75) | 0.95    | 0.22 (-2.83, 3.28)  | 0.89    | 0.65 (-3.37, 4.67)  | 0.75    |
| MEHHP                                         | -1.14 (-9.30, 7.74)  | 0.79    | -7.35 (-20.8, 6.14) | 0.28    | -0.07 (-3.73, 3.59) | 0.97    | -0.17 (-3.04, 2.70) | 0.91    | 0.82 (-2.97, 4.61)  | 0.67    |
| MEOHP                                         | -2.58 (-10.5, 6.08)  | 0.55    | -4.18 (-18.8, 10.4) | 0.57    | 0.65 (-3.28, 4.58)  | 0.75    | 1.46 (-1.64, 4.57)  | 0.35    | 0.46 (-3.62, 4.53)  | 0.83    |
| MECPP                                         | -2.92 (-11.1, 5.97)  | 0.51    | -3.27 (-17.4, 10.9) | 0.65    | 1.27 (-2.58, 5.13)  | 0.52    | 2.67 (-0.30, 5.63)  | 0.08    | 0.59 (-3.41, 4.58)  | 0.77    |
| ΣDEHP                                         | -2.91 (-10.8, 5.73)  | 0.50    | -5.44 (-21.6, 10.7) | 0.51    | 0.92 (-3.48, 5.33)  | 0.68    | 2.08 (-1.35, 5.51)  | 0.23    | 0.74 (-3.82, 5.30)  | 0.75    |
| MBzP                                          | -8.68 (-18.2, 1.88)  | 0.10    | -2.26 (-18.3, 13.8) | 0.78    | 1.08 (-3.31, 5.47)  | 0.63    | 3.75 (0.36, 7.14)   | 0.03*   | -2.69 (-7.23, 1.85) | 0.24    |
| MBP                                           | -6.71 (-15.4, 2.81)  | 0.16    | -0.02 (-21.1, 21.1) | 1.00    | 1.42 (-4.07, 6.90)  | 0.61    | 0.50 (-3.81, 4.80)  | 0.82    | 0.76 (-4.93, 6.45)  | 0.79    |

|       |                     |      |                     |      |                     |      |                    |      |                     |      |
|-------|---------------------|------|---------------------|------|---------------------|------|--------------------|------|---------------------|------|
| MiBP  | -8.29 (-17.5, 1.91) | 0.11 | -2.98 (-21.0, 15.0) | 0.74 | -1.53 (-6.41, 3.36) | 0.54 | 0.86 (-2.89, 4.60) | 0.65 | -0.27 (-5.35, 4.82) | 0.92 |
| MEP   | -4.11 (-12.3, 4.85) | 0.36 | -2.07 (-12.5, 8.33) | 0.70 | 2.12 (-0.56, 4.81)  | 0.12 | 0.74 (-1.38, 2.86) | 0.49 | 1.83 (-0.96, 4.62)  | 0.20 |
| M CPP | -6.92 (-14.5, 1.31) | 0.10 | -9.80 (-31.8, 12.2) | 0.38 | 0.74 (-5.19, 6.67)  | 0.81 | 1.24 (-3.31, 5.78) | 0.59 | 0.46 (-5.70, 6.62)  | 0.88 |

**Visit 4 : median 35 weeks of gestation**

|       | <b>ln-TSH</b>       |      | <b>Free T4</b>     |       | <b>Total T3</b>     |      | <b>Total T4</b>    |       | <b>T3/T4 Ratio</b>   |       |
|-------|---------------------|------|--------------------|-------|---------------------|------|--------------------|-------|----------------------|-------|
| MEHP  | -6.31 (-14.7, 2.86) | 0.17 | 2.98 (-2.84, 8.80) | 0.31  | 0.31 (-4.31, 4.93)  | 0.90 | 4.03 (1.19, 6.88)  | 0.01* | -6.18 (-10.9, -1.47) | 0.01* |
| MEHHP | 0.17 (-9.36, 10.7)  | 0.97 | 2.95 (-3.32, 9.21) | 0.36  | 1.20 (-3.74, 6.13)  | 0.63 | 1.90 (-1.20, 4.99) | 0.23  | -4.30 (-9.39, 0.78)  | 0.10  |
| MEOHP | -1.12 (-10.9, 9.78) | 0.83 | 3.59 (3.00, 10.17) | 0.28  | 1.34 (-3.81, 6.49)  | 0.61 | 3.01 (-0.23, 6.25) | 0.07  | -5.76 (-11.0, -0.48) | 0.03* |
| M CPP | -0.74 (-11.5, 11.4) | 0.90 | 4.32 (-2.94, 11.6) | 0.24  | 1.68 (-3.86, 7.23)  | 0.55 | 4.23 (0.65, 7.80)  | 0.02* | -5.37 (-11.1, 0.33)  | 0.06  |
| ΣDEHP | -2.03 (-12.3, 9.49) | 0.72 | 4.43 (-2.55, 11.4) | 0.21  | 1.71 (-3.75, 7.17)  | 0.54 | 3.99 (0.56, 7.42)  | 0.02* | -5.88 (-11.5, -0.28) | 0.04* |
| MBzP  | 5.29 (-5.63, 17.5)  | 0.35 | 8.26 (1.34, 15.2)  | 0.02* | -2.84 (-8.03, 2.35) | 0.28 | 0.42 (-3.03, 3.87) | 0.81  | -6.09 (-11.4, -0.77) | 0.03* |
| MBP   | -1.29 (-12.3, 11.1) | 0.83 | 3.42 (-4.07, 10.9) | 0.37  | -0.51 (-6.00, 4.98) | 0.85 | 0.02 (-3.67, 3.71) | 0.99  | -3.60 (-9.26, 2.06)  | 0.21  |
| MiBP  | -2.44 (-13.4, 9.96) | 0.68 | 3.45 (-4.35, 11.2) | 0.39  | -1.23 (-6.94, 4.48) | 0.67 | 0.37 (-3.56, 4.29) | 0.85  | -1.58 (-7.74, 4.58)  | 0.61  |
| MEP   | -2.04 (-11.8, 8.79) | 0.70 | 2.97 (-3.82, 9.77) | 0.39  | 3.34 (-1.59, 8.27)  | 0.18 | 0.61 (-2.78, 3.99) | 0.73  | 3.01 (-2.19, 8.22)   | 0.26  |
| M CPP | -5.15 (-14.3, 5.01) | 0.31 | 8.55 (2.05, 15.1)  | 0.01* | 1.64 (-3.11, 6.38)  | 0.50 | 0.51 (-2.74, 3.75) | 0.76  | -1.26 (-6.18, 3.66)  | 0.61  |

Linear regression models adjusted for urinary specific gravity, gestational age at time of sample collection, maternal age at enrollment, body mass index (BMI) at time of sample collection, and health insurance provider.

\*p<0.05
